# Supplementary material for: Construction of Ni/Ni3N heterojunctions as reversible micro-reaction centers for lithium polysulfides
Source: Royal Society of Chemistry journal article supplement (doi:10.1039/d2ta04095f), 2022-01-01
Supplement: d2ta04095f1.pdf [file d2ta04095f1.pdf]

# Construction of Ni/Ni<sub>3</sub>N Heterojunction as Lithium Polysulfides Reversible Micro-Reaction Centers

Tingjiao Xiao<sup>a</sup>, Fengjin Yi<sup>a</sup>, He Wang<sup>a</sup>, Mingzhi Yang<sup>a</sup>, Weiliang Liu<sup>a</sup>, Manman

Ren<sup>a,\*</sup>, Xu Zhang<sup>b,\*</sup>, Zhen Zhou<sup>b</sup>

<sup>a</sup> School of Materials Science and Engineering, Qilu University of Technology (Shandong Academy of Sciences), Jinan 250353, PR China

<sup>b</sup> Engineering Research Center of Advanced Functional Material Manufacturing of Ministry of Education, School of Chemical Engineering, Zhengzhou University, Zhengzhou 450001, P. R. China.

## Experimental section

### Preparation of Materials

Hollow carbon nanotubes (CNT) were firstly synthesized using the method which has been reported in the previous work<sup>1</sup>. Next, 15 mL of ethanol, 0.2 g of CNT and 0.4 g of NiCl<sub>2</sub>·6H<sub>2</sub>O mixed uniformly by ultrasonication, and then the mixture was dried at 50°C. The obtained powder was calcined at 600 °C for 3 h in a pure ammonia atmosphere to obtain the Ni/Ni<sub>3</sub>N-CNT, and calcined at 500°C for 3 h to obtain the Ni<sub>3</sub>N-CNT.

The Ni/Ni<sub>3</sub>N-CNT/S electrode materials were obtained through a typical melt-diffusion approach. Sulfur powder was well-mixed with Ni/Ni<sub>3</sub>N-CNT with a weight ratio of 6:4. Then the mixture was heated at 155°C for 12 h in an argon atmosphere. The Ni<sub>3</sub>N-CNT/S was also prepared through the same procedure.

### Adsorption test

The first step in this section is to prepare the  $\text{Li}_2\text{S}_6$  solution (5 mM).  $\text{Li}_2\text{S}$  and S were firstly dissolved in a solution of DME/DOL ( $v/v = 1:1$ ) with a molar ratio of 1:5, followed by continuous stirring at  $60^\circ\text{C}$  for 18 h. Next, Ni/ $\text{Ni}_3\text{N}$ -CNT and  $\text{Ni}_3\text{N}$ -CNT with the same weight (20 mg) were added to the  $\text{Li}_2\text{S}_6$  solution (2 mL), respectively. Finally, the mixed solutions were vigorously shaken for 2 min and then rested at room temperature for 3 h.<sup>2,3</sup>

### **Electrochemical measurements of LSBs**

The active materials (Ni/ $\text{Ni}_3\text{N}$ -CNT/S and  $\text{Ni}_3\text{N}$ -CNT/S), polyvinylidene fluoride (PVDF), and acetylene black with the weight ratio of 7:1:2 was dispersed in NMP to form a uniform slurry. Then the slurry was coated onto an Al foil and dried at  $50^\circ\text{C}$  for 12 h under vacuum. The diameter of the electrode was 1.2 cm, and the sulfur loading was  $1.2\text{ mg cm}^{-2}$  in long cycle performance at 1 C and 5 C, the sulfur loading was  $5\text{ mg cm}^{-2}$  in Figure 7b.

Electrochemical performances were tested in a standard CR2032 simulated battery with Li foil and PP as the anode and separator, respectively. Under normal conditions, the electrolyte is a solution of 1.0 M LiTFSI and 1.0 %  $\text{LiNO}_3$  dissolved in DME/DOL ( $v/v = 1:1$ ). The electrolyte dosage was accurately controlled with an electrolyte/sulfur ratio  $\approx 50\text{ }\mu\text{L mg}^{-1}$ . Galvanostatic charge/discharge measurements were performed on a Neware battery testing system in a potential window of 1.7-2.8 V. CV were conducted on a CHI760E electrochemical workstation at different scan rates in the potential range of 1.7-2.8 V. EIS spectra were obtained on a CHI760E electrochemical workstation, the frequency ranged from 100 kHz to 0.01 Hz and the amplitude was 5 mV.

## **Material Characterization**

Morphological characterization of the prepared samples was measured using scanning electron microscope (SEM, Hitachi S-4800), Transmission electron microscope (TEM), and high-resolution TEM (Tecnai G2F30S-Twin). X-ray diffractometer (XRD) tests of the samples were conducted by using Cu K $\alpha$  radiation (Shimadzu XRD-6100AS). Nitrogen adsorption/desorption isotherms and Brunauer-Emmett-Teller surface area were gained with a Micromeritics Gemini V2380 analyzer operating at 77 K. X-ray photoelectron spectroscopy (XPS) analysis was obtained using an ESCALAB250 spectrometer with Mg K $\alpha$  radiation as the excitation source. TGA (METTLER) was conducted in air at a heating rate of 10 °C min<sup>-1</sup>.

## **Theoretical Calculation**

Here the density functional theory (DFT) calculations were performed based on plane-wave technique as implemented in Vienna ab initio simulation package (VASP).<sup>4</sup> The projector augmented wave (PAW) approach was adopted to describe the ion-electron interaction.<sup>5</sup> The generalized gradient approximation (GGA) in the form of functional of Perdew, Burke, and Ernzerhof (PBE) was used to describe the exchange-correlation energy.<sup>6</sup> An energy cutoff of 450 eV was used for the plane wave-basis set. The revised Perdew-Burke-Ernzerhof (RPBE) functional was employed to describe the adsorption of sulfides on metal surfaces.<sup>7</sup> To avoid the artificial interactions, a vacuum space with at least 20 Å was inserted along *z* direction. Considering the crystal lattice match between Ni and Ni<sub>3</sub>N, the model of (001) surface was built in this work. A Monkhorst-Pack *k*-point mesh of 3×3×1 was used.<sup>8</sup> For the surface model, the lower

two atomic layers of the slabs were fixed during optimization while other atoms were fully relaxed.

When the polysulfides including (especially S<sub>8</sub> and Li<sub>2</sub>S<sub>8</sub>) adsorbed on the metal surface, these molecules would be decomposed and therefore the reaction energy of the discharge process from Li<sub>2</sub>S<sub>6</sub> to Li<sub>2</sub>S on the metal surfaces was computed based on the reaction sequence of \*Li<sub>2</sub>S<sub>6</sub> → \*Li<sub>2</sub>S<sub>4</sub> → \*Li<sub>2</sub>S<sub>2</sub> → \*Li<sub>2</sub>S. The corresponding reaction energy was calculated by:

$$E_{*Li_2S_4} + \frac{1}{4}E_{S_8} - E_{*Li_2S_6}$$

$$E_{*Li_2S_2} + \frac{1}{4}E_{S_8} - E_{*Li_2S_4}$$

$$E_{*Li_2S} + \frac{1}{4}E_{S_8} - E_{*Li_2S_2}$$

in which  $E_{*Li_2S_x}$  is the energy of the Li<sub>2</sub>S<sub>x</sub> molecule adsorbed on catalysts,  $E_{Li}$  is the energy of Li atom in lithium metal and  $E_{S_8}$  is the energy of isolated S<sub>8</sub>. The adsorption energy ( $E_{ads}$ ) was computed by the equation:

$$E_{ads} = E_{tot} - E_{Li_xS_y} - E_{cat}$$

where  $E_{tot}$ ,  $E_{Li_xS_y}$  and  $E_{cat}$  represent the total energy of the complex of the adsorbates (Li<sub>x</sub>S<sub>y</sub> molecules) and the catalysts, the isolated Li<sub>x</sub>S<sub>y</sub> molecules and the catalysts, respectively.

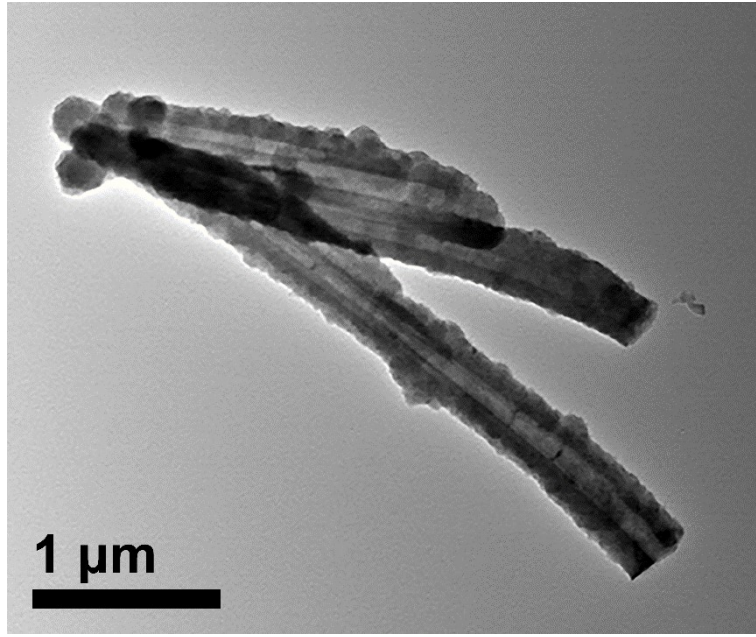

**Figure S1.** TEM images of the CNT.

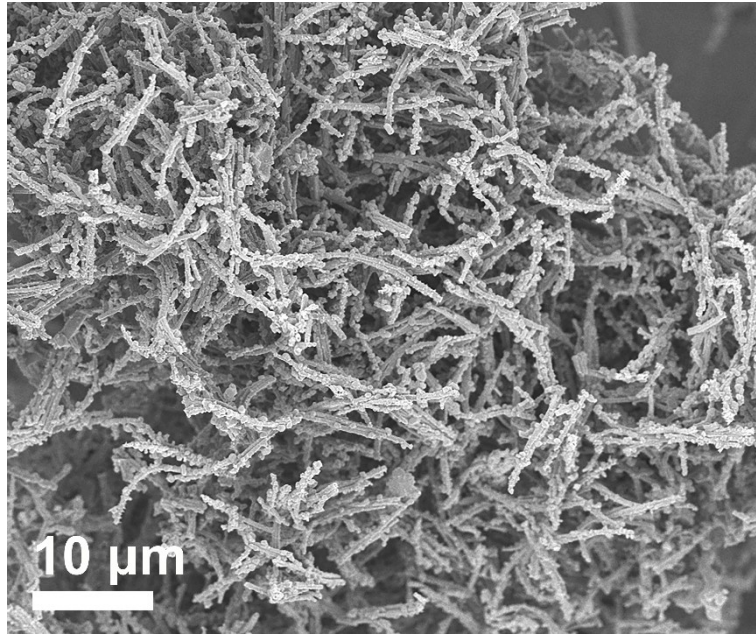

**Figure S2.** SEM images of the Ni/Ni<sub>3</sub>N-CNT.

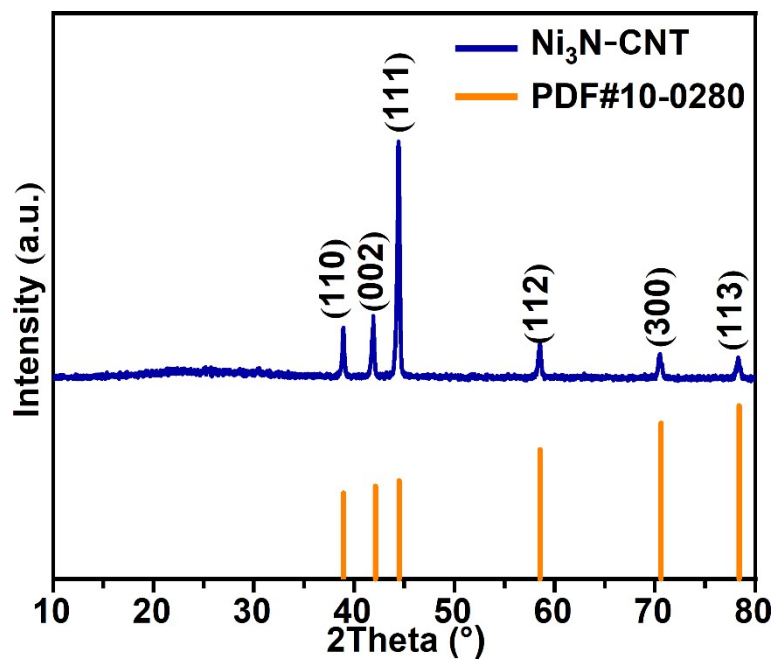

Figure S3. XRD patterns of the Ni<sub>3</sub>N-CNT.

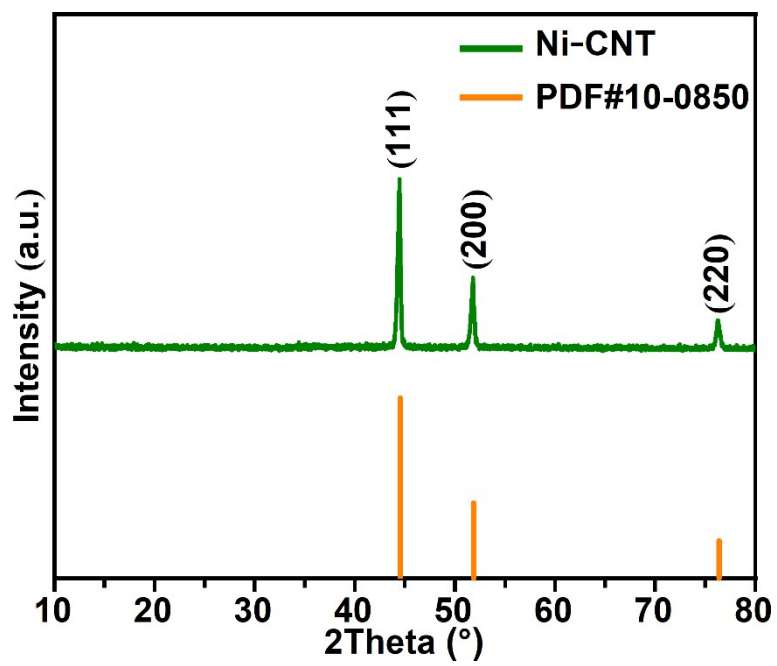

Figure S4. XRD patterns of the Ni-CNT.



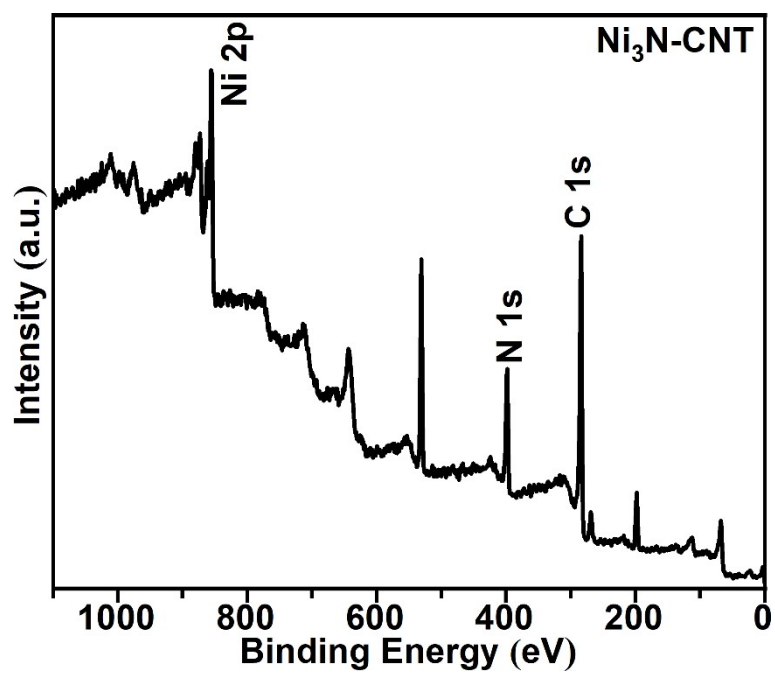

Figure S5. XPS survey spectrum of the Ni<sub>3</sub>N-CNT

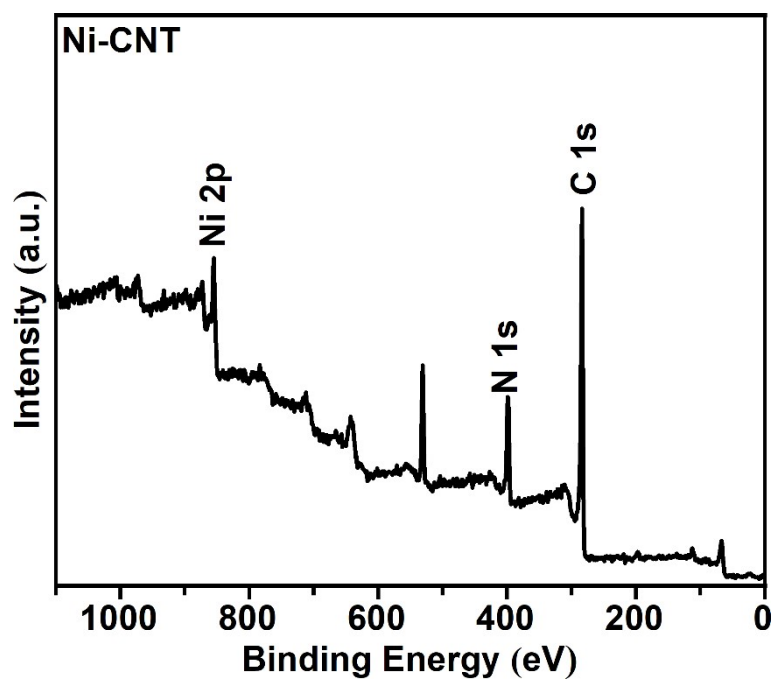

Figure S6. XPS survey spectrum of the Ni-CNT.

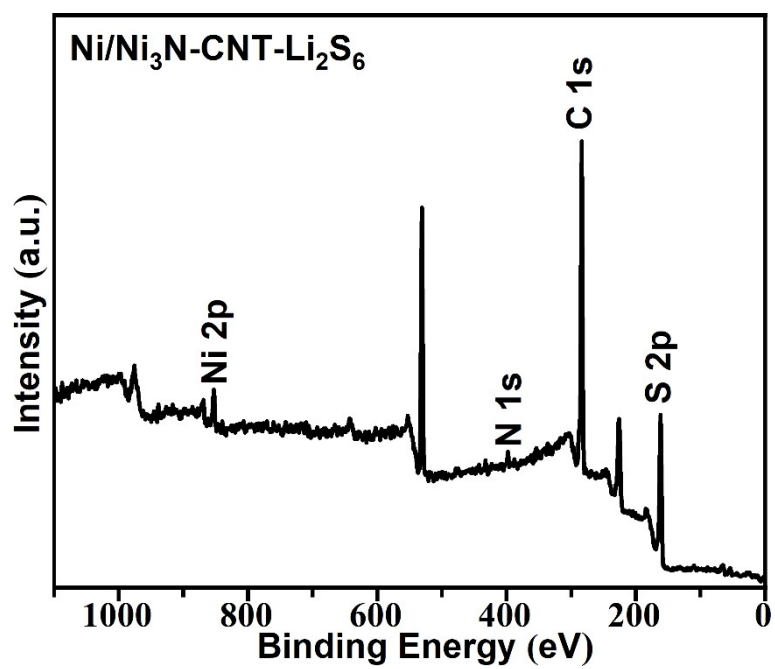

Figure S7. XPS survey spectrum of the Ni/Ni<sub>3</sub>N-CNT-Li<sub>2</sub>S<sub>6</sub>.

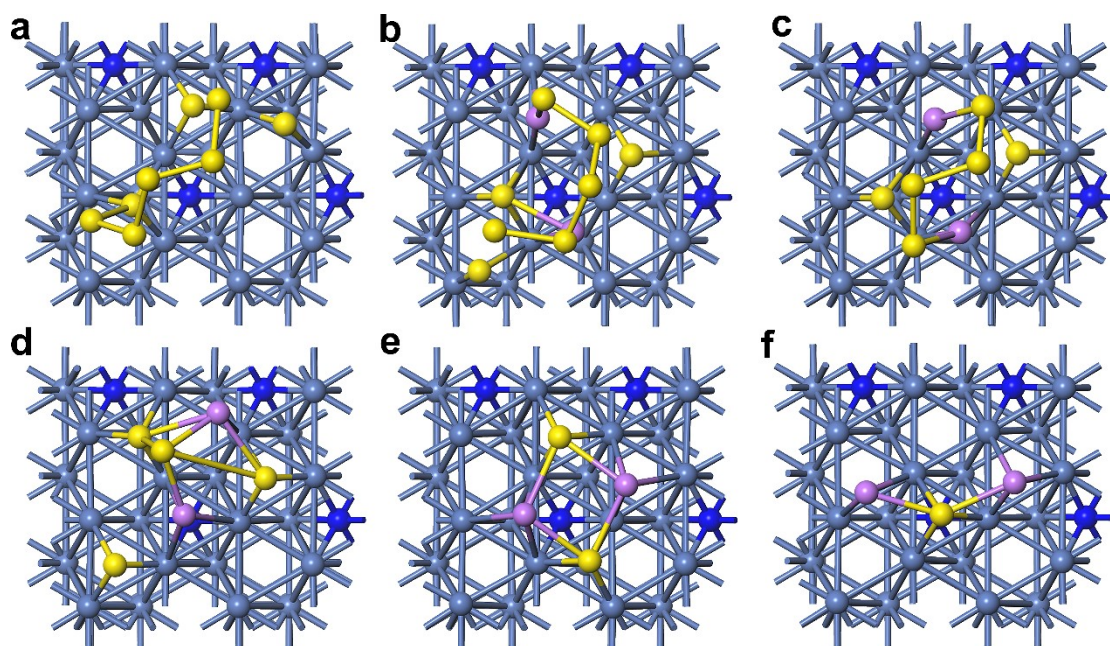

**Figure S8.** Optimized structures of S<sub>8</sub> (a), Li<sub>2</sub>S<sub>8</sub> (b), Li<sub>2</sub>S<sub>6</sub> (c), Li<sub>2</sub>S<sub>4</sub> (d), Li<sub>2</sub>S<sub>2</sub> (e) and Li<sub>2</sub>S (f) on the Ni/Ni<sub>3</sub>N surface. Yellow, purple balls represent S, Li atoms, respectively.

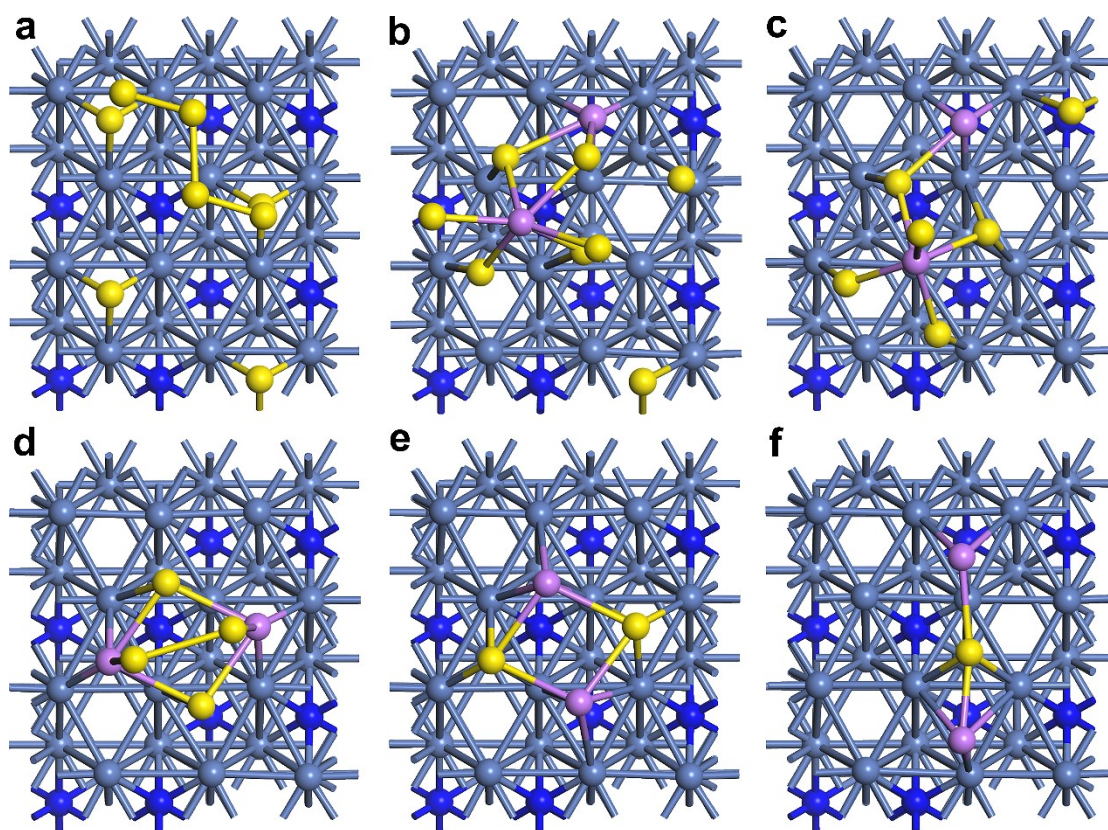

**Figure S9.** Optimized structures of  $S_8$  (a),  $Li_2S_8$  (b),  $Li_2S_6$  (c),  $Li_2S_4$  (d),  $Li_2S_2$  (e) and  $Li_2S$  (f) on the  $Ni_3N$  surface. Yellow, purple balls represent S, Li atoms, respectively.

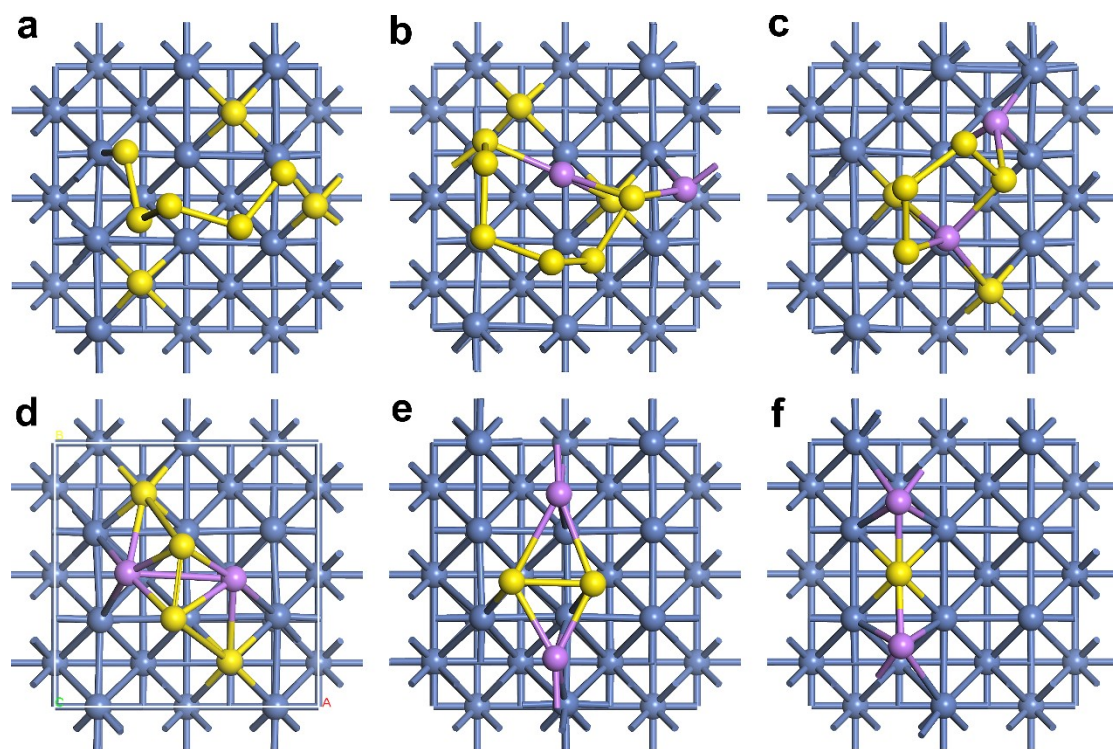

**Figure S10.** Optimized structures of S<sub>8</sub> (a), Li<sub>2</sub>S<sub>8</sub> (b), Li<sub>2</sub>S<sub>6</sub> (c), Li<sub>2</sub>S<sub>4</sub> (d), Li<sub>2</sub>S<sub>2</sub> (e) and Li<sub>2</sub>S (f) on Ni the surface. Yellow, purple balls represent S, Li atoms, respectively.

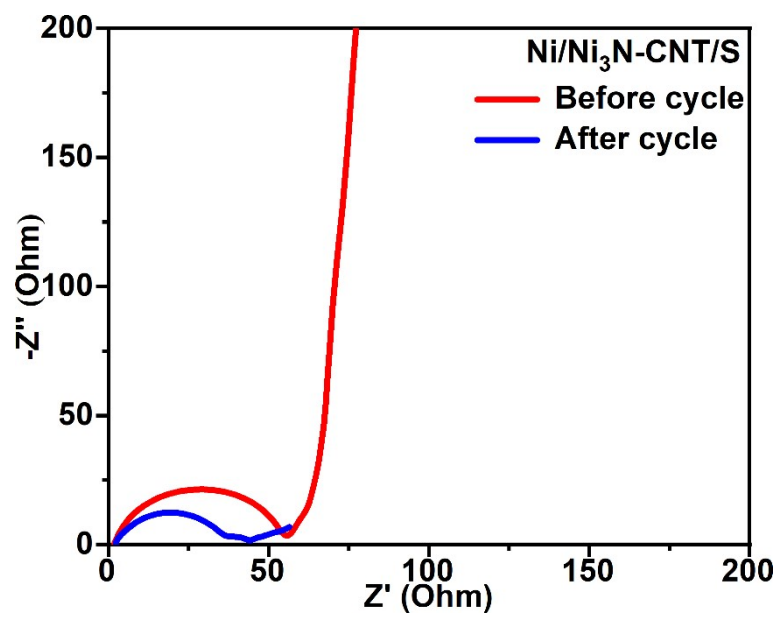

**Figure S11.** Nyquist plots of the Ni/Ni<sub>3</sub>N-CNT/S electrode before and after cycling.

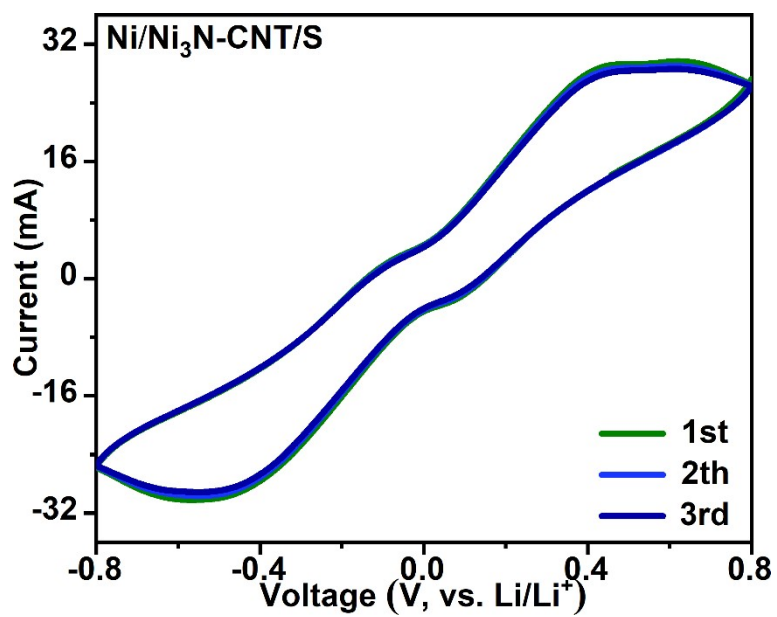

**Figure S12.** CV curves of Ni/Ni<sub>3</sub>N-CNT and CNT symmetric cells in the first three cycle.



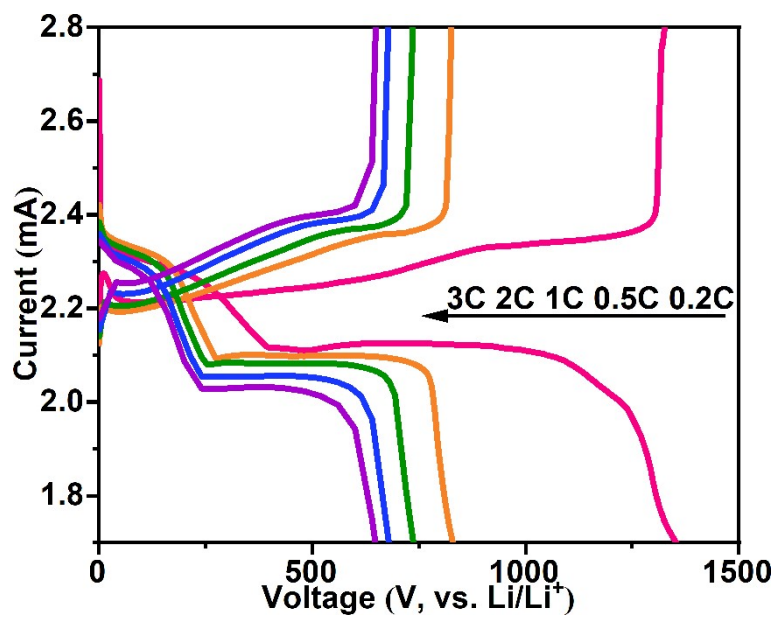

**Figure S13.** Galvanostatic charge-discharge curves of the Ni/Ni<sub>3</sub>N-CNT/S electrode at 0.2-3 C.

## References

1. W. Zhong, Q. W. Chen, F. Yang, W. Liu, G. D. Li, K. Xie and M. M. Ren, *J. Electroanal. Chem.*, 2019, **850**, 113392.
2. Z. Wu, S. Chen, L. Wang, Q. Deng, Z. Zeng, J. Wng and S. Deng, *Energy Stor. Mater.*, 2021, **38**, 381-388.
3. T. J. Xiao, L. X. Zhao, H. H. Ge, M. Z. Yang, W. L. Liu, G. D. Li, M. M. Ren, X. Zhang and Z. Zhou, *Chem. Eng. J.*, 2022, **439**, 1385-8947.
4. G. Kresse and J. Furthmüller, *Phys Rev B*, 1996, **54**, 11169-11186.
5. G. Kresse and D. Joubert, *Phys Rev B*, 1999, **59**, 1758-1775.
6. J. P. Perdew, K. Burke and M. Ernzerhof, *Phys Rev Lett*, 1996, **77**, 3865-3868.
7. B. Hammer, L. B. Hansen and J. K. Nørskov, *Phys Rev B*, 1999, **59**, 7413-7421.
8. H. J. Monkhorst and J. D. Pack, *Phys Rev B*, 1976, **13**, 5188-5192.
